# Supplementary material for: Self-seeding microwell chip for the isolation and characterization of single cells
Source: Royal Society of Chemistry journal article supplement (doi:10.1039/c5lc00304k), 2015-01-01
Supplement: c5lc00304k3.pdf [file c5lc00304k3.pdf]

Supplementary data S3

| <b>DIRECT SPIKE EXPERIMENT</b> |                           |     |                             |     |                          |        |
|--------------------------------|---------------------------|-----|-----------------------------|-----|--------------------------|--------|
|                                | # cells spiked            |     | # Cells captured in cups    |     | % cells captured in cups |        |
|                                | LNCaP                     | PC3 | LNCaP                       | PC3 | LNCaP                    | PC3    |
| 1                              | 217                       | 214 | 137                         | 176 | 63,1%                    | 82,2%  |
| 2                              | 143                       | 195 | 60                          | 155 | 42,0%                    | 79,5%  |
| 3                              | 102                       | 148 | 70                          | 143 | 68,6%                    | 96,6%  |
| 4                              | 106                       | 199 | 68                          | 147 | 64,2%                    | 73,9%  |
| 5                              | 84                        | 110 | 76                          | 110 | 90,5%                    | 100,0% |
| 6                              | 120                       | 107 | 116                         | 105 | 96,7%                    | 98,1%  |
| total                          | 772                       | 973 | 527                         | 836 | 68,3%                    | 85,9%  |
|                                | <b>Total Cells spiked</b> |     | <b>Total Cells captured</b> |     | <b>Percentage</b>        |        |
|                                | <b>1745</b>               |     | <b>1363</b>                 |     | <b>78,1%</b>             |        |

Table 1a

| <b>SPIKE IN CELLSAVE BLOOD</b> |                           |     |                             |     |                          |        |
|--------------------------------|---------------------------|-----|-----------------------------|-----|--------------------------|--------|
|                                | # cells CellSearch        |     | # Cells captured in cups    |     | % cells captured in cups |        |
|                                | LNCaP                     | PC3 | LNCaP                       | PC3 | LNCaP                    | PC3    |
| 1                              | 141                       | 16  | 87                          | 5   | 61,7%                    | 31,3%  |
| 2                              | 135                       | 14  | 97                          | 11  | 71,9%                    | 78,6%  |
| 3                              | 221                       | 118 | 213                         | 120 | 96,4%                    | 101,7% |
| 4                              | 270                       | 123 | 225                         | 118 | 83,3%                    | 95,9%  |
| 5                              | 112                       | 188 | 114                         | 180 | 101,8%                   | 95,7%  |
| 6                              | 205                       | 175 | 144                         | 127 | 70,2%                    | 72,6%  |
| total                          | 1084                      | 634 | 880                         | 561 | 81,2%                    | 88,5%  |
|                                | <b>Total Cells spiked</b> |     | <b>Total Cells captured</b> |     | <b>Percentage</b>        |        |
|                                | <b>1718</b>               |     | <b>1441</b>                 |     | <b>83,9%</b>             |        |

Table 1b

Efficiency of the filtration in microwells was determined by two separate experiments. Table 1a presents the data of direct spiking of cells onto the cups. LNCaP and PC3 cells were prestained with Celltracker green or Celltracker Orange (Invitrogen), counted on a slide and directly flushed into the fluid above a cups filter. After filtration the cups filters were scanned and the number of cells from both cellines were counted. Table 1b presents the data from an experiment where prestained cells were spiked in 7.5 ml of blood. The Cells are enriched by the CellSearch test and counted. All Cells from the CellSearch cartridge were transferred to a cups filter and counted again.
